## CORRECTIONS

### *Activation by anserine and inhibition by carnosine of $\text{Ca}^{2+}$ -uptake by mammalian mitochondria*

By RACHAEL L. DANIEL,  
NICOLA J. OSBALDESTON and  
JAMES G. McCORMACK

Volume 20 No. 2 (1992)

p. 131S. We have been unable to reproduce the observations described in the above abstract and poster presentation. On further investigation, it has transpired that, contrary to what was stated, the original observations were made using test solutions, which were either not subjected to pH correction or were improperly pH-adjusted. Therefore, it would appear that all of the effects described can be rather attributed to changes in medium pH brought about by the additions of carnosine or anserine test solutions. These in turn would have caused changes in medium  $[\text{Ca}^{2+}]$  which would then have brought about the effects described, as the EGTA-Ca buffer system used is particularly sensitive to pH changes over the range used. On repeating the experiments with properly corrected pH solutions, no substantial effects of either anserine or carnosine on mitochondrial  $\text{Ca}^{2+}$ -uptake were observed.

### *n-Chimaerin and neuronal signal transduction mechanisms*

By LOUIS LIM

Volume 20 No. 3 (1992)

p. 611. The third section beginning:

#### ***n-Chimaerin functions as a GTPase activating protein***

The bacterially expressed *n*-chimaerin (and the related C-terminal domain of BCR) acts as a GTPase activating protein (GAP) for p21 *rac* [11]. The

should read:

#### ***n-Chimaerin is a phorbol ester receptor***

*n*-Chimaerin expressed in *Escherichia coli* as TrpE or glutathione-S-transferase fusion proteins exhibits phospholipid-dependent phorbol ester binding [8].

### *Early protein kinase and biosynthetic responses to insulin*

By PERRY J. BLACKSHEAR

Volume 20 No. 3 (1992)

The unfolioed section header page that appeared between pages 684 and 685 should have been printed between pages 716 and 235S preceding the communications section.

### *Activators and inhibitors of the motility of Fucus Serratus*

By CHRISTINE O'TOOLE and  
CAROL BROWNSON

Volume 20 No. 3 (1992)

p. 252S. Title should read:

### *Activators and inhibitors of the motility of spermatozoa of Fucus serratus*

### *The isolation and characterization of P-element insertions into G protein genes*

By KATRIN LINERUTH and TERENCE DAVIS

Volume 20 No. 3 (1992)

p. 261S. List of authors should read:

K. LINERUTH, A. DUNCANSON, K. KAISER,  
K. O'DELL and T. DAVIS

### *Lability of an ATP-activated lipid antioxidant system in rat liver microsomes*

By MARK DEVEREUX, TERENCE HALLINAN,  
JAYESH GOR, CATHERINE RICE-EVANS and  
PETER J. SAVILL

p. 332S. In Table 1, footnote below and text above, the Fe-chelate should read Fe/ADP. In no cases was Fe/ATP used. The statement in the text "Table 1 shows that LPO kinetics from 10–40 min were identical with fresh or mature iron-ATP" is a mistake, while the following sentence "Iron-ADP chelates similarly gave identical kinetics" is redundant.

*A lipophilic protein inhibitor of neutral cholesteryl ester  
hydrolase: mode of action*

By JOHN H. SHAND and DAVID W. WEST

Volume 20 No. 4 (1992)

p. 334S. Paragraph 3, line 18: '38 pmol' should read '760 pmol'. Paragraph 3, line 21: '13.5 pmol' should read '270 pmol'.
